# Supplementary material
Source: Springer Nature journal article supplement (https://www.springermedizin.de/resource/supplementary/13075_2010_3028_MOESM3_ESM.pdf/9693370)

case 5003

Left Hand

Right Hand

Left Foot

Right Foot

CIA score

PID 0

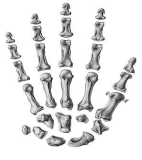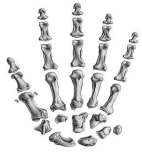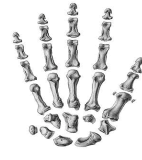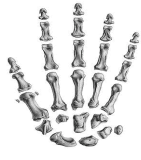

0

PID 21

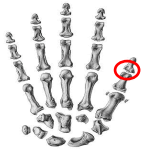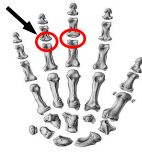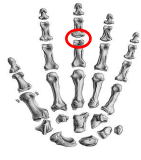

3

PID 25

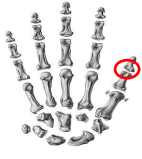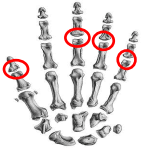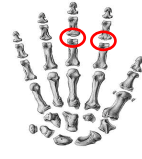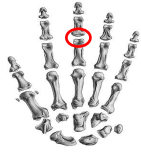

3

PID 28

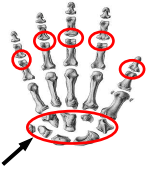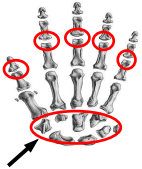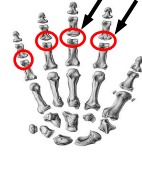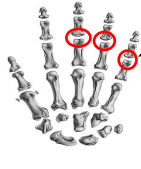

3

PID 32

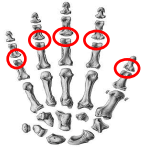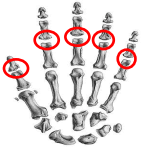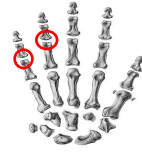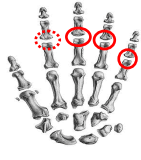

3

PID 35

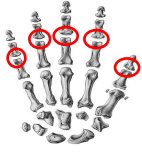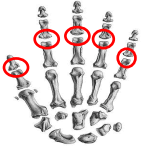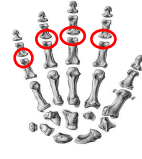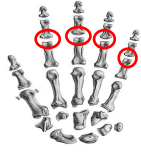

3

PID 42

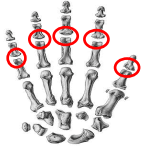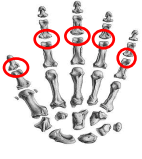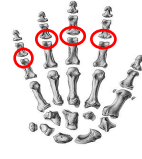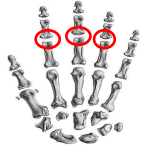

3

PID 47

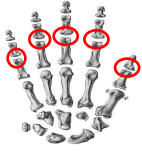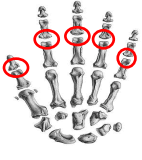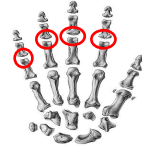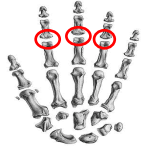

5

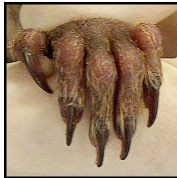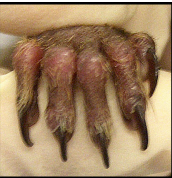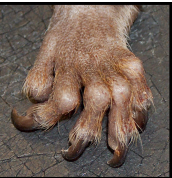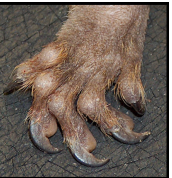

Supplement: MOESM3 [file 9693370]
